# Supplementary material
Source: MDPI journal article supplement (https://www.mdpi.com/1424-2818/15/5/592)
Supplement: s1 [file s1]

**Table S3. Comparative percent dissimilarity matrix of 16S-23S ITS region of *C. solincola* KUT1-PS and *C. badium* 18C-PS with their phylogenetically related taxa based on 16S rRNA gene**

| No. | Strains                                             | 1    | 2    | 3    | 4    | 5    | 6    | 7    | 8    | 9    | 10   | 11   |
|-----|-----------------------------------------------------|------|------|------|------|------|------|------|------|------|------|------|
| 1   | <i>C. solincola</i> KUT1-PS (OQ055347)              | -    |      |      |      |      |      |      |      |      |      |      |
| 2   | <i>C. badium</i> 18C-PS (OQ055346)                  | 13.6 | -    |      |      |      |      |      |      |      |      |      |
| 3   | <i>C. muscicola</i> SAG 44.79 (KF111150)            | 12.6 | 8.2  | -    |      |      |      |      |      |      |      |      |
| 4   | <i>C. badium</i> CCALA 1000 operon 1 (KF052616)     | 14.5 | 4.1  | 7.9  | -    |      |      |      |      |      |      |      |
| 5   | <i>C. catenatum</i> CCALA 999 operon 1 (KF052615)   | 15.3 | 7.3  | 8.4  | 5.9  | -    |      |      |      |      |      |      |
| 6   | <i>C. catenatum</i> CCALA 996 operon 1 (KF052611)   | 15.3 | 7.3  | 8.4  | 5.9  | 0.0  | -    |      |      |      |      |      |
| 7   | <i>C. alatosporum</i> CCALA 994 operon 1 (KF052609) | 12.2 | 14.6 | 13.8 | 15.0 | 14.6 | 14.6 | -    |      |      |      |      |
| 8   | <i>C. moravicum</i> CCALA 993 operon 1 (KF052607)   | 15.0 | 5.5  | 7.8  | 7.1  | 6.1  | 6.1  | 13.4 | -    |      |      |      |
| 9   | <i>C. catenatum</i> CCALA 991 operon 1 (KF052603)   | 15.4 | 7.9  | 8.9  | 6.6  | 1.4  | 1.4  | 15.4 | 6.8  | -    |      |      |
| 10  | <i>C. catenatum</i> CCALA 990 operon 1 (KF052601)   | 15.4 | 8.1  | 8.9  | 6.4  | 1.9  | 1.9  | 15.0 | 7.1  | 2.4  | -    |      |
| 11  | <i>C. alatosporum</i> CCALA 988 operon 1 (KF052599) | 13.3 | 13.6 | 13.2 | 14.6 | 13.7 | 13.7 | 8.4  | 13.0 | 14.7 | 13.9 | -    |
| 12  | <i>C. stagnale</i> PCC 7417 (CP003642)              | 15.5 | 16.6 | 15.9 | 16.8 | 16.0 | 16.0 | 13.8 | 15.2 | 16.6 | 16.6 | 12.2 |
