# Supplementary material
Source: MDPI journal article supplement (https://www.mdpi.com/1424-2818/15/5/592)
Supplement: s1 [file s1]

**Table S2: Comparison of nucleotide length of the 16S-23S ITS regions of *C. solincola* KUT1-PS and *C. badium* 18C-PS with their phylogenetically related taxa based on 16S rRNA gene**

| Species/Strains                            | Leader | D1-D1' Helix | spacer+D2 | spacer +D3+spacer | tRNA <sup>isoleucine</sup> | spacer+V2+spacer | tRNA <sup>alanine</sup> | Spacer+BoxB+spacer | BoxA | Spacer+D4+spacer | V3 | End of ITS | Total ITS length |
|--------------------------------------------|--------|--------------|-----------|-------------------|----------------------------|------------------|-------------------------|--------------------|------|------------------|----|------------|------------------|
| <i>C. solincola</i> KUT1-PS                | 7      | 64           | 35        | 16                | 75                         | 85               | 73                      | 160                | 11   | 29               | 34 | 25         | 614              |
| <i>C. badium</i> 18C-PS                    | 7      | 64           | 31        | 16                | 75                         | 84               | 73                      | 164                | 11   | 27               | 41 | 20         | 613              |
| <i>C. stagnale</i> PCC 7417 (CP003642)     | 7      | 64           | 32        | 16                | 75                         | 84               | 73                      | 160                | 11   | 29               | 33 | 29         | 613              |
| <i>C. alatosporum</i> CCALA 988 (KF052599) | 7      | 64           | 31        | 16                | 75                         | 86               | 73                      | 158                | 11   | 29               | 35 | 30         | 615              |
| <i>C. alatosporum</i> CCALA 994 (KF052609) | 7      | 64           | 31        | 16                | 75                         | 86               | 73                      | 159                | 11   | 30               | 35 | 30         | 617              |
| <i>C. catenatum</i> CCALA 990 (KF052601)   | 7      | 64           | 31        | 16                | 75                         | 86               | 73                      | 160                | 11   | 28               | 41 | 26         | 618              |
| <i>C. catenatum</i> CCALA 991 (KF052603)   | 7      | 64           | 31        | 16                | 75                         | 86               | 73                      | 160                | 11   | 28               | 41 | 26         | 618              |
| <i>C. catenatum</i> CCALA 996 (KF052611)   | 7      | 64           | 31        | 16                | 75                         | 86               | 73                      | 160                | 11   | 28               | 41 | 26         | 618              |
| <i>C. catenatum</i> CCALA 999 (KF052615)   | 7      | 64           | 31        | 16                | 75                         | 86               | 73                      | 160                | 11   | 28               | 41 | 26         | 618              |
| <i>C. muscicola</i> SAG 44.79 (KF111150)   | 7      | 64           | 31        | 16                | 75                         | 86               | 73                      | 160                | 11   | 28               | 41 | 25         | 617              |
| <i>C. badium</i> CCALA 1000 (KF052616)     | 7      | 64           | 31        | 16                | 75                         | 86               | 73                      | 160                | 11   | 27               | 41 | 26         | 617              |
| <i>C. moravicum</i> CCALA 993 (KF052607)   | 7      | 64           | 31        | 16                | 75                         | 84               | 73                      | 159                | 11   | 28               | 41 | 26         | 615              |
