# Supplementary material
Source: MDPI journal article supplement (https://www.mdpi.com/1424-2818/15/5/592)
Supplement: s1 [file s1]

Table S1. Comparative percent similarity matrix of the 16S rRNA gene of *C. solincola* KUT1-PS and *C. badium* 18C-PS with their phylogenetically related taxa based on 16S rRNA gene

| No. | Strain ID                                            | 1    | 2    | 3     | 4    | 5    | 6    | 7    | 8    | 9    | 10    | 11   | 12   | 13    | 14   | 15   | 16   | 17    | 18   | 19   | 20   | 21    | 22    | 23    | 24   | 25    | 26   | 27   | 28    | 29   | 30   | 31   | 32   | 33   | 34    | 35   | 36   | 37   | 38   | 39 | 40 | 41 | 42 |  |
|-----|------------------------------------------------------|------|------|-------|------|------|------|------|------|------|-------|------|------|-------|------|------|------|-------|------|------|------|-------|-------|-------|------|-------|------|------|-------|------|------|------|------|------|-------|------|------|------|------|----|----|----|----|--|
| 1   | <i>C. solincola</i> KUT1-PS (OQ055347)               | -    |      |       |      |      |      |      |      |      |       |      |      |       |      |      |      |       |      |      |      |       |       |       |      |       |      |      |       |      |      |      |      |      |       |      |      |      |      |    |    |    |    |  |
| 2   | <i>C. badium</i> 18C-PS (OQ055346)                   | 96.3 | -    |       |      |      |      |      |      |      |       |      |      |       |      |      |      |       |      |      |      |       |       |       |      |       |      |      |       |      |      |      |      |      |       |      |      |      |      |    |    |    |    |  |
| 3   | <i>C. sp.</i> YK2-01 (AB694931)                      | 96.5 | 99.5 | -     |      |      |      |      |      |      |       |      |      |       |      |      |      |       |      |      |      |       |       |       |      |       |      |      |       |      |      |      |      |      |       |      |      |      |      |    |    |    |    |  |
| 4   | <i>C. stagnale</i> PCC 7417 (AF132789)               | 98.5 | 97.0 | 97.3  | -    |      |      |      |      |      |       |      |      |       |      |      |      |       |      |      |      |       |       |       |      |       |      |      |       |      |      |      |      |      |       |      |      |      |      |    |    |    |    |  |
| 5   | <i>C. stagnale</i> PCC 7417 (AJ133163)               | 98.6 | 97.1 | 97.5  | 99.9 | -    |      |      |      |      |       |      |      |       |      |      |      |       |      |      |      |       |       |       |      |       |      |      |       |      |      |      |      |      |       |      |      |      |      |    |    |    |    |  |
| 6   | <i>C. sp.</i> NIES-4074 (AP018269)                   | 96.6 | 99.5 | 100.0 | 97.4 | 97.6 | -    |      |      |      |       |      |      |       |      |      |      |       |      |      |      |       |       |       |      |       |      |      |       |      |      |      |      |      |       |      |      |      |      |    |    |    |    |  |
| 7   | <i>C. alatosporum</i> SAG 43.79 (GQ287650)           | 98.6 | 96.9 | 97.3  | 99.5 | 99.7 | 97.3 | -    |      |      |       |      |      |       |      |      |      |       |      |      |      |       |       |       |      |       |      |      |       |      |      |      |      |      |       |      |      |      |      |    |    |    |    |  |
| 8   | <i>C. siamensis</i> SAG 11.82 (GQ389643)             | 97.0 | 98.2 | 98.3  | 97.2 | 97.4 | 98.3 | 97.1 | -    |      |       |      |      |       |      |      |      |       |      |      |      |       |       |       |      |       |      |      |       |      |      |      |      |      |       |      |      |      |      |    |    |    |    |  |
| 9   | <i>C. alatosporum</i> CCALA 988 operon 1 (KF052599)  | 98.7 | 97.1 | 97.2  | 98.6 | 98.8 | 97.2 | 99.0 | 97.6 | -    |       |      |      |       |      |      |      |       |      |      |      |       |       |       |      |       |      |      |       |      |      |      |      |      |       |      |      |      |      |    |    |    |    |  |
| 10  | <i>C. pellucidum</i> CCALA 989 operon 2 (KF052600)   | 97.8 | 98.0 | 98.2  | 98.2 | 98.4 | 98.2 | 98.5 | 98.7 | 98.8 | -     |      |      |       |      |      |      |       |      |      |      |       |       |       |      |       |      |      |       |      |      |      |      |      |       |      |      |      |      |    |    |    |    |  |
| 11  | <i>C. catenatum</i> CCALA 990 operon 1 (KF052601)    | 98.1 | 97.9 | 98.1  | 98.3 | 98.5 | 98.1 | 98.6 | 99.0 | 98.6 | 99.7  | -    |      |       |      |      |      |       |      |      |      |       |       |       |      |       |      |      |       |      |      |      |      |      |       |      |      |      |      |    |    |    |    |  |
| 12  | <i>C. catenatum</i> CCALA 990 operon 2 (KF052602)    | 98.0 | 97.9 | 98.0  | 98.2 | 98.4 | 98.0 | 98.5 | 98.9 | 98.5 | 99.7  | 99.9 | -    |       |      |      |      |       |      |      |      |       |       |       |      |       |      |      |       |      |      |      |      |      |       |      |      |      |      |    |    |    |    |  |
| 13  | <i>C. catenatum</i> CCALA 991 operon 1 (KF052603)    | 97.9 | 98.0 | 98.1  | 98.1 | 98.3 | 98.1 | 98.4 | 98.8 | 98.6 | 99.7  | 99.8 | 99.9 | -     |      |      |      |       |      |      |      |       |       |       |      |       |      |      |       |      |      |      |      |      |       |      |      |      |      |    |    |    |    |  |
| 14  | <i>C. catenatum</i> CCALA 991 operon 2 (KF052604)    | 97.2 | 98.0 | 98.0  | 97.3 | 97.5 | 98.0 | 97.6 | 98.7 | 98.4 | 99.5  | 99.6 | 99.7 | 99.7  | -    |      |      |       |      |      |      |       |       |       |      |       |      |      |       |      |      |      |      |      |       |      |      |      |      |    |    |    |    |  |
| 15  | <i>C. pellucidum</i> CCALA 992 operon 1 (KF052605)   | 97.8 | 97.9 | 98.1  | 98.1 | 98.3 | 98.1 | 98.4 | 98.6 | 98.7 | 99.9  | 99.7 | 99.6 | 99.7  | 99.4 | -    |      |       |      |      |      |       |       |       |      |       |      |      |       |      |      |      |      |      |       |      |      |      |      |    |    |    |    |  |
| 16  | <i>C. pellucidum</i> CCALA 992 operon 2 (KF052606)   | 97.8 | 98.0 | 98.2  | 98.2 | 98.4 | 98.2 | 98.5 | 98.7 | 98.8 | 100.0 | 99.7 | 99.7 | 99.7  | 99.5 | 99.9 | -    |       |      |      |      |       |       |       |      |       |      |      |       |      |      |      |      |      |       |      |      |      |      |    |    |    |    |  |
| 17  | <i>C. moravicum</i> CCALA 993 operon 1 (KF052607)    | 97.1 | 98.6 | 98.8  | 98.0 | 98.2 | 98.8 | 97.8 | 98.9 | 97.6 | 98.6  | 98.5 | 98.4 | 98.5  | 98.3 | 98.5 | 98.6 | -     |      |      |      |       |       |       |      |       |      |      |       |      |      |      |      |      |       |      |      |      |      |    |    |    |    |  |
| 18  | <i>C. moravicum</i> CCALA 993 operon 2 (KF052608)    | 97.1 | 98.6 | 98.8  | 98.0 | 98.2 | 98.8 | 97.8 | 98.9 | 97.6 | 98.6  | 98.5 | 98.4 | 98.5  | 98.3 | 98.5 | 98.6 | 100.0 | -    |      |      |       |       |       |      |       |      |      |       |      |      |      |      |      |       |      |      |      |      |    |    |    |    |  |
| 19  | <i>C. alatosporum</i> CCALA 994 operon 1 (KF052609)  | 98.8 | 97.0 | 97.1  | 98.7 | 98.9 | 97.2 | 99.2 | 97.7 | 99.8 | 98.6  | 98.6 | 98.5 | 98.5  | 98.2 | 98.5 | 98.6 | 97.4  | 97.4 | -    |      |       |       |       |      |       |      |      |       |      |      |      |      |      |       |      |      |      |      |    |    |    |    |  |
| 20  | <i>C. licheniforme</i> CCALA 995 operon 2 (KF052610) | 97.7 | 98.3 | 98.4  | 98.4 | 98.6 | 98.4 | 98.7 | 98.5 | 98.5 | 99.4  | 99.4 | 99.3 | 99.4  | 99.1 | 99.3 | 99.4 | 99.0  | 99.0 | 98.3 | -    |       |       |       |      |       |      |      |       |      |      |      |      |      |       |      |      |      |      |    |    |    |    |  |
| 21  | <i>C. catenatum</i> CCALA 996 operon 1 (KF052611)    | 97.9 | 98.0 | 98.1  | 98.1 | 98.3 | 98.1 | 98.4 | 98.8 | 98.6 | 99.7  | 99.8 | 99.9 | 100.0 | 99.7 | 99.7 | 99.7 | 98.5  | 98.5 | 98.5 | 99.4 | -     |       |       |      |       |      |      |       |      |      |      |      |      |       |      |      |      |      |    |    |    |    |  |
| 22  | <i>C. catenatum</i> CCALA 996 operon 2 (KF052612)    | 97.9 | 98.0 | 98.1  | 98.1 | 98.3 | 98.1 | 98.4 | 98.8 | 98.6 | 99.7  | 99.8 | 99.9 | 100.0 | 99.7 | 99.7 | 99.7 | 98.5  | 98.5 | 98.5 | 99.4 | 100.0 | -     |       |      |       |      |      |       |      |      |      |      |      |       |      |      |      |      |    |    |    |    |  |
| 23  | <i>C. catenatum</i> CCALA 997 operon 2 (KF052613)    | 97.9 | 98.0 | 98.1  | 98.1 | 98.3 | 98.1 | 98.4 | 98.8 | 98.6 | 99.7  | 99.8 | 99.9 | 100.0 | 99.7 | 99.7 | 99.7 | 98.5  | 98.5 | 98.5 | 99.4 | 100.0 | 100.0 | -     |      |       |      |      |       |      |      |      |      |      |       |      |      |      |      |    |    |    |    |  |
| 24  | <i>C. maius</i> CCALA 998 operon 2 (KF052614)        | 98.7 | 97.2 | 97.3  | 99.6 | 99.6 | 97.3 | 99.1 | 97.4 | 99.0 | 97.9  | 98.0 | 97.9 | 97.8  | 97.6 | 97.8 | 97.9 | 97.8  | 97.8 | 99.1 | 98.1 | 97.8  | 97.8  | 97.8  | -    |       |      |      |       |      |      |      |      |      |       |      |      |      |      |    |    |    |    |  |
| 25  | <i>C. catenatum</i> CCALA 999 operon 1 (KF052615)    | 97.4 | 98.2 | 98.2  | 97.5 | 97.7 | 98.2 | 97.8 | 98.9 | 98.6 | 99.7  | 99.8 | 99.9 | 100.0 | 99.8 | 99.7 | 99.7 | 98.5  | 98.5 | 98.5 | 99.4 | 100.0 | 100.0 | 100.0 | 97.8 | -     |      |      |       |      |      |      |      |      |       |      |      |      |      |    |    |    |    |  |
| 26  | <i>C. badium</i> CCALA 1000 operon 1 (KF052616)      | 96.8 | 99.7 | 99.9  | 97.6 | 97.8 | 99.9 | 97.5 | 98.4 | 97.3 | 98.3  | 98.2 | 98.1 | 98.2  | 97.9 | 98.2 | 98.3 | 98.9  | 98.9 | 97.2 | 98.5 | 98.2  | 98.2  | 98.2  | 97.4 | 98.2  | -    |      |       |      |      |      |      |      |       |      |      |      |      |    |    |    |    |  |
| 27  | <i>C. marchicum</i> CCALA 1001 operon 2 (KF052617)   | 97.3 | 97.2 | 97.2  | 97.5 | 97.7 | 97.2 | 97.8 | 98.0 | 97.8 | 98.4  | 98.6 | 98.5 | 98.5  | 98.2 | 98.3 | 98.4 | 97.3  | 97.3 | 97.8 | 98.2 | 98.5  | 98.5  | 98.5  | 97.2 | 98.5  | 97.3 | -    |       |      |      |      |      |      |       |      |      |      |      |    |    |    |    |  |
| 28  | <i>C. muscicola</i> SAG 44.79 (KF111150)             | 98.1 | 98.1 | 98.2  | 98.4 | 98.6 | 98.3 | 98.7 | 98.9 | 98.9 | 99.8  | 99.9 | 99.8 | 99.9  | 99.7 | 99.7 | 99.8 | 98.7  | 98.7 | 98.7 | 99.6 | 99.9  | 99.9  | 99.9  | 98.1 | 99.9  | 98.4 | 98.5 | -     |      |      |      |      |      |       |      |      |      |      |    |    |    |    |  |
| 29  | <i>C. muscicola</i> SAG 44.79 operon 2 (KF111151)    | 98.1 | 98.0 | 98.2  | 98.3 | 98.5 | 98.2 | 98.6 | 98.9 | 98.8 | 99.8  | 99.9 | 99.8 | 99.9  | 99.7 | 99.7 | 99.8 | 98.6  | 98.6 | 98.6 | 99.6 | 99.9  | 99.9  | 99.9  | 98.0 | 99.9  | 98.3 | 98.5 | 100.0 |      |      |      |      |      |       |      |      |      |      |    |    |    |    |  |
| 30  | <i>C. muscicola</i> SAG 44.79 (KM019946)             | 97.4 | 98.2 | 98.3  | 97.7 | 97.8 | 98.3 | 97.9 | 98.9 | 98.7 | 99.7  | 99.8 | 99.7 | 99.8  | 99.7 | 99.7 | 99.7 | 98.6  | 98.6 | 98.5 | 99.4 | 99.8  | 99.8  | 99.8  | 97.9 | 99.9  | 98.3 | 98.5 | 100.0 | 99.9 | -    |      |      |      |       |      |      |      |      |    |    |    |    |  |
| 31  | <i>C. stagnale</i> BEA 0605B (MN845140)              | 98.7 | 96.8 | 97.1  | 99.3 | 99.4 | 97.2 | 99.7 | 97.1 | 99.2 | 98.3  | 98.4 | 98.3 | 98.2  | 97.5 | 98.2 | 98.3 | 97.6  | 97.6 | 99.4 | 98.4 | 98.2  | 98.2  | 98.2  | 99.3 | 97.7  | 97.3 | 97.6 | 98.4  | 98.4 | 97.8 | -    |      |      |       |      |      |      |      |    |    |    |    |  |
| 32  | <i>C. sp.</i> CHAB2115 (MK209094)                    | 98.7 | 96.7 | 96.9  | 99.5 | 99.5 | 97.0 | 99.1 | 97.0 | 98.8 | 97.9  | 98.0 | 97.9 | 97.8  | 97.2 | 97.8 | 97.9 | 97.7  | 97.7 | 99.0 | 98.0 | 97.8  | 97.8  | 97.8  | 99.8 | 97.4  | 97.2 | 97.1 | 98.0  | 98.0 | 97.5 | 99.4 | -    |      |       |      |      |      |      |    |    |    |    |  |
| 33  | <i>C. stagnale</i> PCC 7417 (CP003642)               | 98.5 | 97.3 | 97.4  | 99.6 | 99.7 | 97.5 | 99.4 | 97.6 | 98.8 | 98.4  | 98.5 | 98.4 | 98.4  | 97.8 | 98.4 | 98.4 | 98.3  | 98.3 | 99.0 | 98.6 | 98.4  | 98.4  | 98.4  | 99.6 | 98.0  | 97.8 | 97.8 | 98.6  | 98.5 | 98.1 | 99.2 | 99.6 | -    |       |      |      |      |      |    |    |    |    |  |
| 34  | <i>C. licheniforme</i> UTEX B 2014 (KX014846)        | 98.9 | 96.9 | 97.1  | 99.3 | 99.3 | 97.1 | 99.5 | 97.3 | 99.5 | 98.5  | 98.6 | 98.5 | 98.4  | 97.7 | 98.4 | 98.5 | 97.5  | 97.5 | 99.7 | 98.5 | 98.4  | 98.4  | 98.4  | 99.4 | 98.0  | 97.3 | 97.7 | 98.7  | 98.6 | 98.1 | 99.8 | 99.5 | 99.3 | -     |      |      |      |      |    |    |    |    |  |
| 35  | <i>C. licheniforme</i> UTEX 2014 (AB075983)          | 98.8 | 96.5 | 96.8  | 99.2 | 99.2 | 96.8 | 99.5 | 96.9 | 99.5 | 98.3  | 98.4 | 98.3 | 98.2  | 97.6 | 98.3 | 98.3 | 97.2  | 97.2 | 99.7 | 98.3 | 98.2  | 98.2  | 98.2  | 99.4 | 97.7  | 97.0 | 97.4 | 98.5  | 98.4 | 97.8 | 99.8 | 99.5 | 99.2 | 100.0 | -    |      |      |      |    |    |    |    |  |
| 36  | <i>C. sp.</i> ACSSI 010 (KY283041)                   | 97.5 | 97.5 | 97.8  | 97.8 | 97.9 | 97.9 | 98.0 | 98.2 | 98.3 | 99.5  | 99.6 | 99.5 | 99.6  | 98.5 | 99.4 | 99.5 | 98.4  | 98.4 | 98.3 | 99.1 | 99.6  | 99.6  | 99.6  | 97.6 | 98.7  | 98.4 | 98.4 | 99.7  | 99.7 | 98.7 | 97.9 | 97.7 | 98.0 | 98.4  | 98.3 | -    |      |      |    |    |    |    |  |
| 37  | <i>C. sp.</i> ACSSI 043 (KY283043)                   | 97.6 | 97.6 | 97.9  | 97.8 | 98.0 | 98.0 | 98.1 | 98.2 | 98.4 | 99.6  | 99.7 | 99.6 | 99.7  | 98.6 | 99.5 | 99.6 | 98.5  | 98.5 | 98.4 | 99.2 | 99.7  | 99.7  | 99.7  | 97.7 | 98.8  | 98.5 | 98.5 | 99.7  | 99.7 | 98.8 | 98.0 | 97.7 | 98.1 | 98.4  | 98.3 | 99.9 | -    |      |    |    |    |    |  |
| 38  | <i>C. skujae</i> ACSSI 112 (KY283076)                | 96.9 | 97.6 | 97.7  | 97.2 | 97.5 | 97.7 | 97.5 | 98.4 | 98.6 | 99.7  | 99.8 | 99.9 | 100.0 | 99.4 | 99.6 | 99.7 | 98.5  | 98.5 | 98.4 | 99.4 | 100.0 | 100.0 | 100.0 | 97.8 | 99.6  | 98.1 | 98.4 | 99.9  | 99.9 | 99.4 | 97.4 | 97.1 | 97.6 | 98.0  | 97.7 | 98.5 | 98.6 | -    |    |    |    |    |  |
| 39  | <i>C. muscicola</i> ACSSI 140 (KY283077)             | 97.3 | 98.1 | 98.1  | 97.5 | 97.7 | 98.1 | 97.8 | 98.8 | 98.6 | 99.7  | 99.8 | 99.9 | 100.0 | 99.8 | 99.6 | 99.7 | 98.5  | 98.5 | 98.4 | 99.4 | 100.0 | 100.0 | 100.0 | 97.8 | 100.0 | 98.1 | 98.4 | 99.9  | 99.9 | 99.9 | 97.6 | 97.4 | 97.9 | 98.0  | 97.7 | 98.7 | 98.8 | 99.6 | -  |    |    |    |  |
| 40  | <i>Anabaena</i> sp. 14-VSmolV10 (KT290364)           | 98.6 | 97.0 | 97.2  | 98.3 | 98.5 | 97.2 | 98.9 | 97.6 | 99.1 | 98.6  |      |      |       |      |      |      |       |      |      |      |       |       |       |      |       |      |      |       |      |      |      |      |      |       |      |      |      |      |    |    |    |    |  |
